# Supplementary material for: Hydrothermal carbonization of various lignocellulosic biomass
Source: Springer Nature journal article supplement (doi:10.1007/s13399-014-0137-3), 2014-07-08
Supplement: MOESM1 [file 11848632]

**Hydrothermal carbonization of various lignocellulosic biomass**

***Biomass Conversion and Biorefinery***

Joan G. Lynam1, M. Toufiq Reza2, Wei Yan3, Victor R. Vásquez1, Charles J. Coronella1*

1 Chemical & Materials Engineering Department, University of Nevada, 1664 N. Virginia St. MS 170
Reno, Nevada 89557 USA

2 *APECS Group, Leibniz Institute for Agricultural Engineering, Max-Eyth-Alee-100, 14469 Potsdam, Germany*

3 Gas Technology Institute, Energy Conversion Division, Des Plaines, IL 60018 USA

*Corresponding author.
Tel: +1-775-784-4253. Fax: +1-775-784-4764. email: coronella@unr.edu

Electronic Supplemental Material:


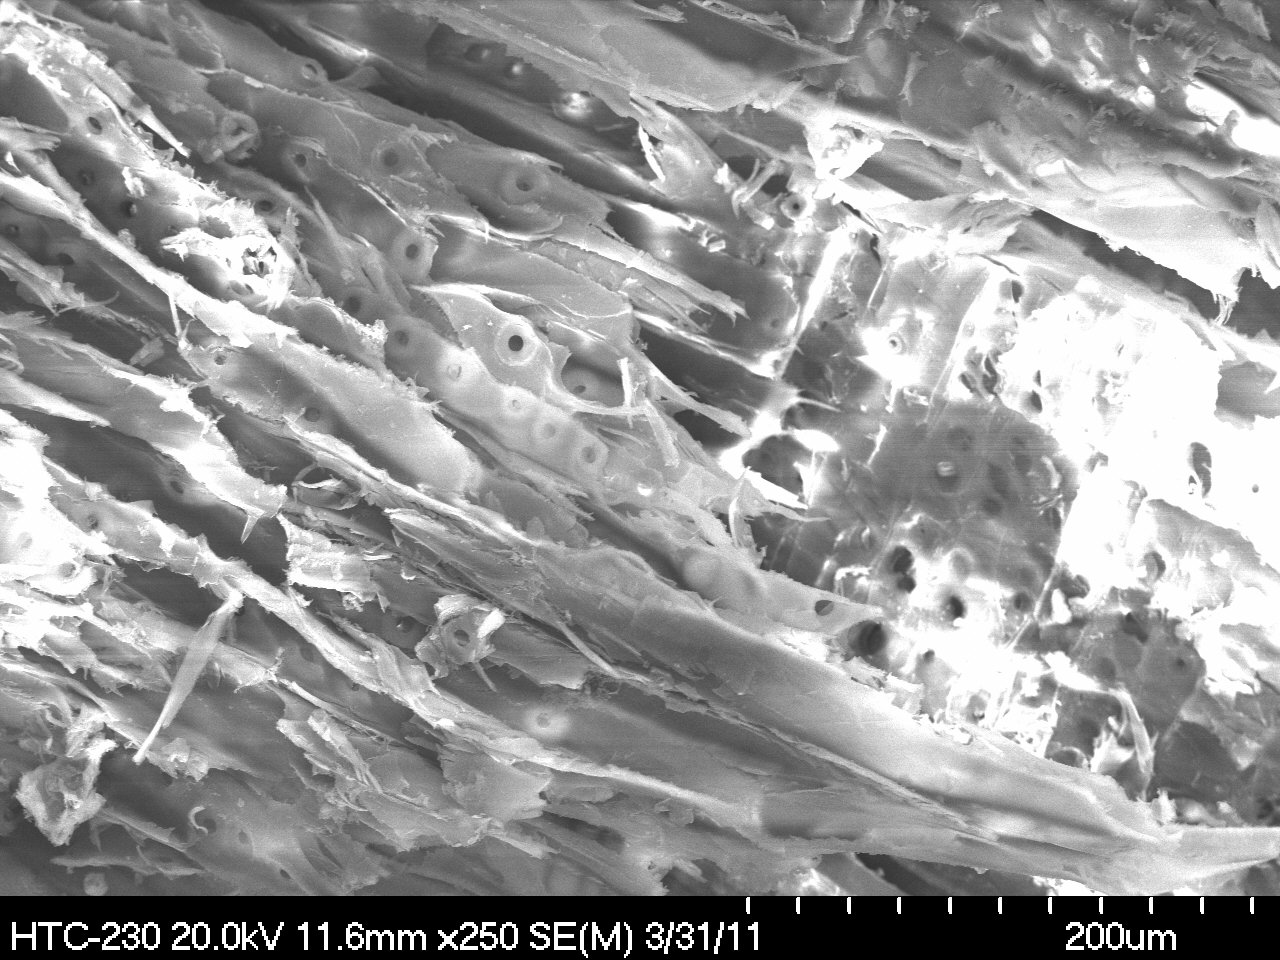
 a


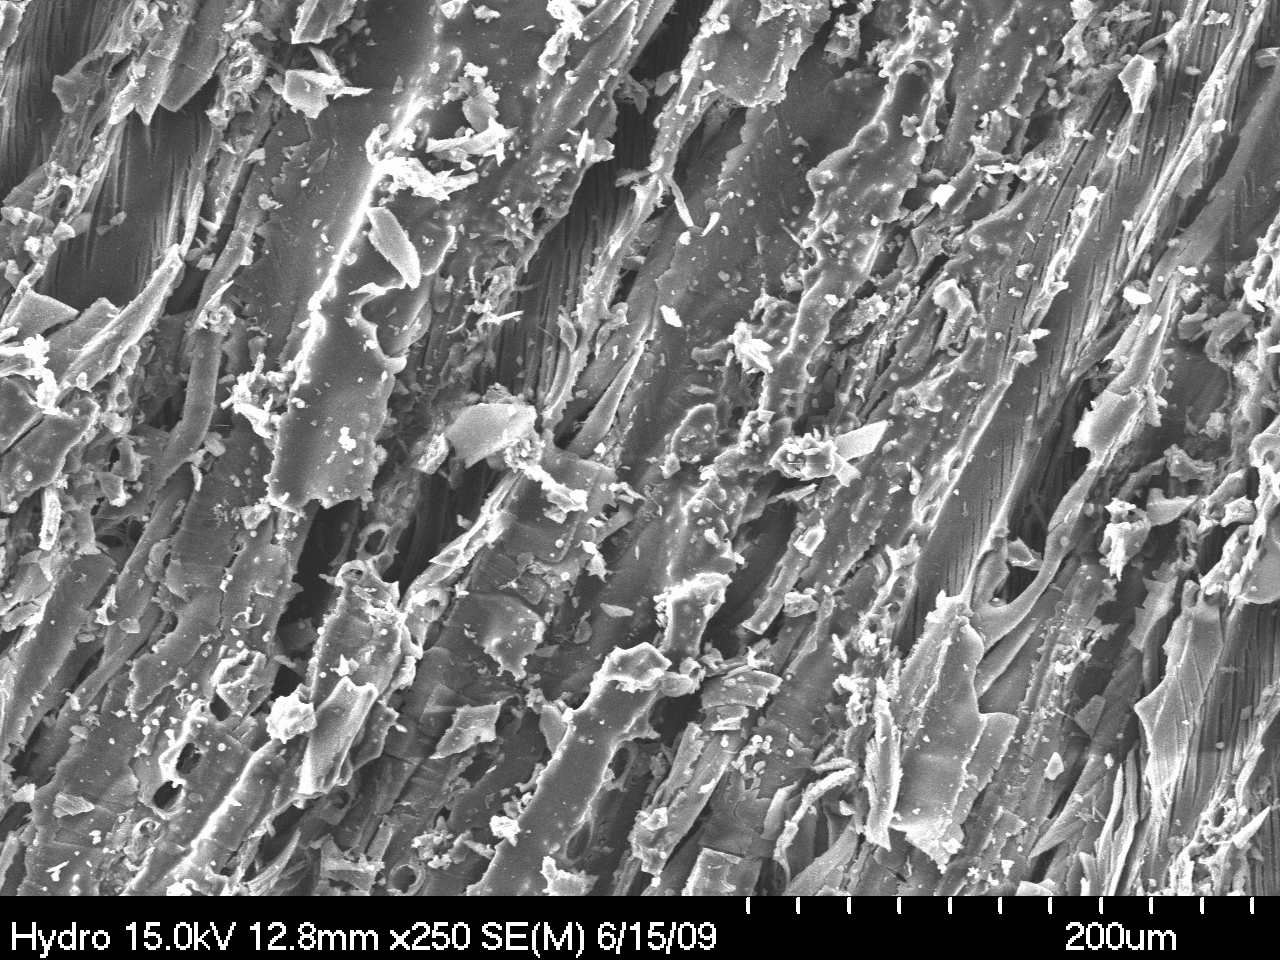
 b


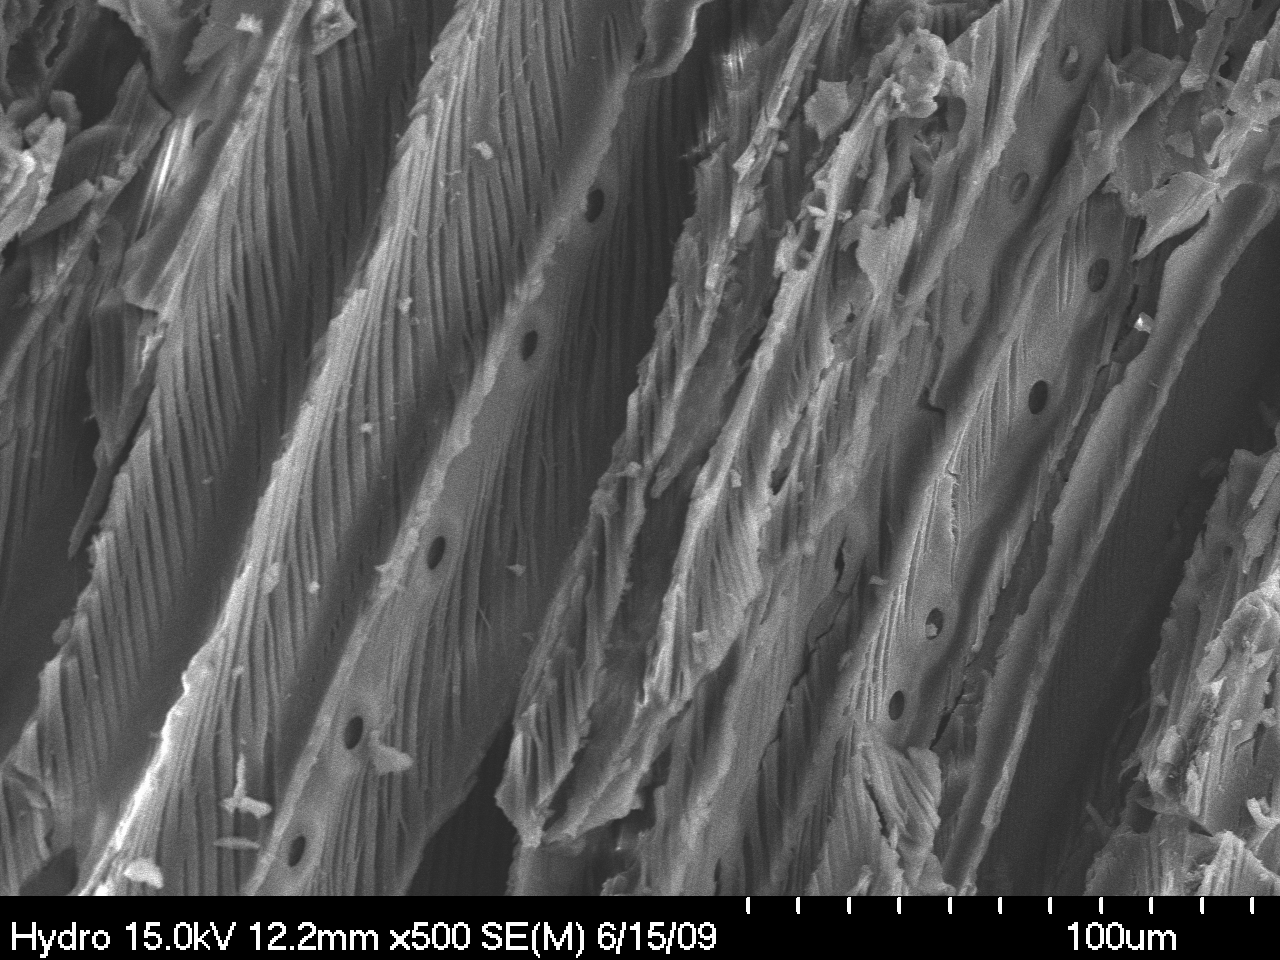
 c

ESM Fig. 1(a) shows biochar pretreated at 230 °C. No spiral morphology is observed, possibly due to complete hemicellulose decomposition, and cellulose appears partially decomposed. The circular holes are uncovered pit structures, which facilitate water transport in the biomass. Cellulose appears to be breaking off from the biochar pretreated at 260°C in ESM Fig. 1(b). With the temperature increase, the plane that separates the cellulose bundles from each other shows little change. This may be because the lignin is mostly inert. Some cracks are present among the long structures as seen in ESM Fig. 1(c), a 500X magnification of ESM Fig. 1(b). Lignin starts decomposing at about 260 °C. Cracks in the walls may indicate that some lignin that binds the cellulose microfibrils together was solubilized.
